# Supplementary material
Source: PubMed Central journal article supplement (PMC3985976)
Supplement: supp_1.2.E68_2013-0002-01-at.pdf [file supp_1.2.E68_2013-0002-01-at.pdf]

**Appendix 1:** Characteristics of 2913 participants in a large community-based cohort in the inner city of Vancouver, by HCV and HIV status

| Characteristic                      | HCV and HIV strata; no. (%) of participants* |                      |                      |                      |                     |
|-------------------------------------|----------------------------------------------|----------------------|----------------------|----------------------|---------------------|
|                                     | HCV+/HIV-†<br>n = 1068                       | HCV-/HIV+‡<br>n = 70 | HCV+/HIV+<br>n = 465 | HCV-/HIV-<br>n = 693 | Unknown§<br>n = 617 |
| Age, yr, mean ± SD                  | 42.4 ± 8.6                                   | 42.5 ± 10.3          | 40.7 ± 7.7           | 41.6 ± 10.6          | 44.9 ± 12.5         |
| Female sex                          | 319 (29.9)                                   | 24 (34.3)            | 176 (37.8)           | 183 (26.4)           | 143 (23.2)          |
| Aboriginal ethnicity                | 327 (30.6)                                   | 29 (41.4)            | 181 (38.9)           | 213 (30.7)           | 145 (23.5)          |
| Unstable housing¶                   | 704 (65.9)                                   | 34 (48.6)            | 280 (60.2)           | 404 (58.3)           | 379 (61.4)          |
| Jail time¶                          | 277 (25.9)                                   | 20 (28.6)            | 108 (23.2)           | 111 (16.0)           | 94 (15.2)           |
| Alcohol use¶                        | 495 (46.3)                                   | 28 (40.0)            | 213 (45.8)           | 403 (58.2)           | 351 (56.9)          |
| Injection or noninjection drug use¶ | 952 (89.1)                                   | 59 (84.3)            | 445 (95.7)           | 489 (70.6)           | 392 (63.5)          |
| Injection drug use¶                 | 582 (54.5)                                   | 33 (47.1)            | 312 (67.1)           | 82 (11.8)            | 105 (17.0)          |
| Overdose¶                           | 90 (8.4)                                     | 9 (12.9)             | 58 (12.5)            | 30 (4.3)             | 18 (2.9)            |
| Methadone treatment¶                | 306 (28.7)                                   | 10 (14.3)            | 188 (40.4)           | 31 (4.5)             | 26 (4.2)            |
| <b>HCV infection**</b>              |                                              |                      |                      |                      |                     |
| Yes                                 | 1068 (100.0)                                 | –                    | 465 (100.0)          | –                    | –                   |
| No                                  | –                                            | 37 (52.9)            | –                    | 693 (100.0)          | 142 (23.0)          |
| Unknown                             | –                                            | 33 (47.1)            | –                    | –                    | 475 (77.0)          |
| <b>HIV infection**</b>              |                                              |                      |                      |                      |                     |
| Yes                                 | –                                            | 70 (100.0)           | 465 (100.0)          | –                    | –                   |
| No                                  | 935 (87.5)                                   | –                    | –                    | 693 (100.0)          | 107 (17.3)          |
| Unknown                             | 133 (12.5)                                   | –                    | –                    | –                    | 510 (82.7)          |

Note: HCV = hepatitis C virus, SD = standard deviation.  
 \*Unless stated otherwise.  
 †Includes participants whose HCV result was positive and whose HIV status was either negative or unknown.  
 ‡Includes participants whose HIV result was positive and whose HCV status was either negative or unknown.  
 §Includes participants whose HCV status and HIV status were both unknown; it also includes participants whose status was unknown for either HCV or HIV and who had a negative HIV or HCV result, respectively.  
 ¶In the 6 months before the survey (self-reported).  
 \*\*Based on all linked laboratory test results (1991–2009).
