# Supplementary material
Source: PubMed Central journal article supplement (PMC3985976)
Supplement: supp_1.2.E68_2013-0002-02-at.pdf [file supp_1.2.E68_2013-0002-02-at.pdf]

**Appendix 2:** Mortality and excess mortality among 617 participants with unknown HCV or HIV status\* in a community-based cohort in the inner city of Vancouver, by cause of death

| Cause of death         | ICD-10 codes | No. of observed deaths | Rate of death per 10 000 person-years (95% CI) | Standardized mortality ratio† (95% CI) |
|------------------------|--------------|------------------------|------------------------------------------------|----------------------------------------|
| All                    |              | 75                     | 213 (170–267)                                  | 4.9 (3.9–6.2)                          |
| Infection              | A00–B99      | 2                      | 6 (1–23)                                       | 1.8 (0.5–7.3)                          |
| Neoplasm               | C00–D48      | 16                     | 45 (28–74)                                     | 3.3 (2.1–5.5)                          |
| Endocrine              | E00–90       | 2                      | 6 (1–23)                                       | 3.7 (0.9–15.0)                         |
| Mental and behavioural | F00–99       | 1                      | 3 (0–20)                                       | 2.7 (0.4–19.1)                         |
| Nervous system         | G00–99       | 1                      | 3 (0–20)                                       | 2.7 (0.4–18.9)                         |
| Circulatory system     | I00–99       | 16                     | 45 (28–74)                                     | 4.7 (2.9–7.7)                          |
| Respiratory system     | J00–99       | 11                     | 31 (17–56)                                     | 9.0 (5.0–16.2)                         |
| Digestive system       | K00–93       | 8                      | 23 (11–45)                                     | 10.3 (5.2–20.6)                        |
| Genitourinary          | N00–99       | 3                      | 9 (3–26)                                       | 14.2 (4.6–44.1)                        |
| Other‡                 | R00–99       | 8                      | 23 (11–45)                                     | 34.5 (17.2–68.9)                       |
| External               | V00–Y98      | 7                      | 20 (9–42)                                      | 3.3 (1.6–7.0)                          |

Note: CI = confidence interval; ICD-10 = International Statistical Classification of Diseases and Related Health Problems, 10th revision.

\*Includes participants whose HCV status and HIV status were both unknown, and those whose status was unknown for either HCV or HIV and who had a negative HIV or HCV result, respectively.

†The reference group was the population of Vancouver.

‡Includes unknown causes of death.
